# Supplementary material
Source: PubMed Central journal article supplement (PMC2800247)
Supplement: cwp159_1.pdf [file cwp159_1.pdf]

# Supplementary Fig. 1

## A. HSulf-1

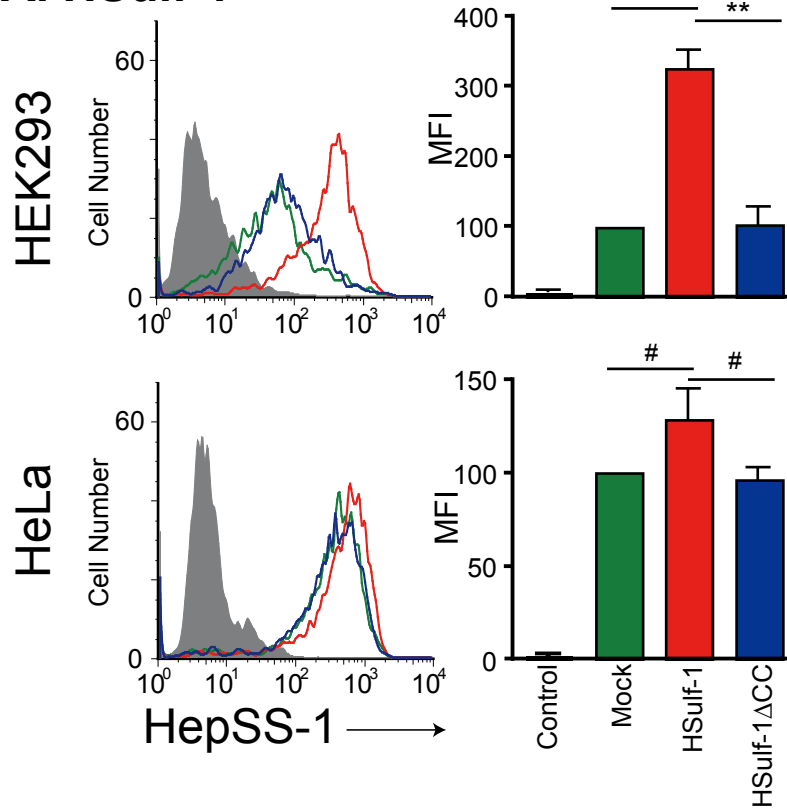

## B. HSulf-2

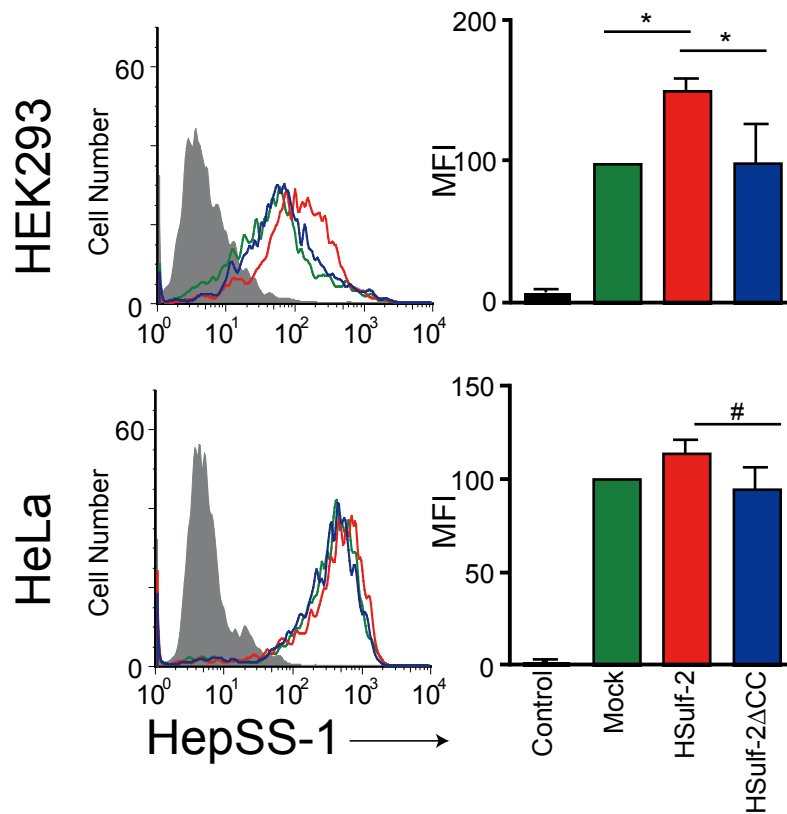

### Supplementary Figure 1. Cell surface expression of HepSS-1 heparan sulfate epitopes in HSulf-transfected HEK2993 and HeLa cells

Flow cytometry of HEK2993 and HeLa cells transiently transfected with pcDNA3.1 empty vector alone (Mock) (A,B), cDNA of HSulf-1 (HSulf-1) (A), HSulf-1ΔCC (HSulf-1ΔCC) (A), HSulf-2 (HSulf-2) (B), or HSulf-2ΔCC (HSulf-2ΔCC) (B) analyzed with HepSS-1. Mean fluorescence intensity (MFI) relative to “Mock” of three independent experiments were shown. Mouse IgM was used as “control”. The values were analyzed by one-way ANOVA with Tukey’s multiple comparison test. \*\*, P<0.001; \*, P<0.01; #, P<0.05.
